# Supplementary material for: High-Resolution PTP1B Inhibition Profiling Combined with HPLC-HRMS-SPE-NMR for Identification of PTP1B Inhibitors from Miconia albicans
Source: PubMed Central journal article supplement (PMC6100288; doi:10.3390/molecules23071755), 2018-07-17
Supplement: molecules-23-01755-s001.pdf [file molecules-23-01755-s001.pdf]

# **High-resolution PTP1B inhibition profiling combined with HPLC-HRMS-SPE-NMR for identification of PTP1B inhibitors from *Miconia albicans***

**Rita de Cássia L. Lima<sup>1</sup>, Kenneth T. Kongstad<sup>1</sup>, Lucília Kato<sup>2</sup>, Marcos José das Silva<sup>3</sup>, Henrik Franzyk<sup>1</sup> and Dan Staerk<sup>1\*</sup>**

<sup>1</sup>Department of Drug Design and Pharmacology, Faculty of Health and Medical Sciences, University of Copenhagen, Universitetsparken 2, DK-2100, Copenhagen, Denmark; rita.lima@sund.ku.dk (R.C.L.L.); kenneth.kongstad@sund.ku.dk (K.T.K.); [hf@sund.ku.dk](mailto:hf@sund.ku.dk) (H.F.); ds@sund.ku.dk (D.S.)

<sup>2</sup>Instituto de Química, Universidade Federal de Goiás, Goiânia-GO, Brazil; [luciliakato@gmail.com](mailto:luciliakato@gmail.com)

<sup>3</sup>Instituto de Ciências Biológicas, Universidade Federal de Goiás, Goiânia-GO, Brazil; [marcos\\_agrorural@hotmail.com](mailto:marcos_agrorural@hotmail.com)

\* Correspondence: ds@sund.ku.dk; Tel.: +45-3533-6177

**Figure S1.** Dose-response curve of the defatted ethyl acetate extract of leaves of *Miconia albicans*.

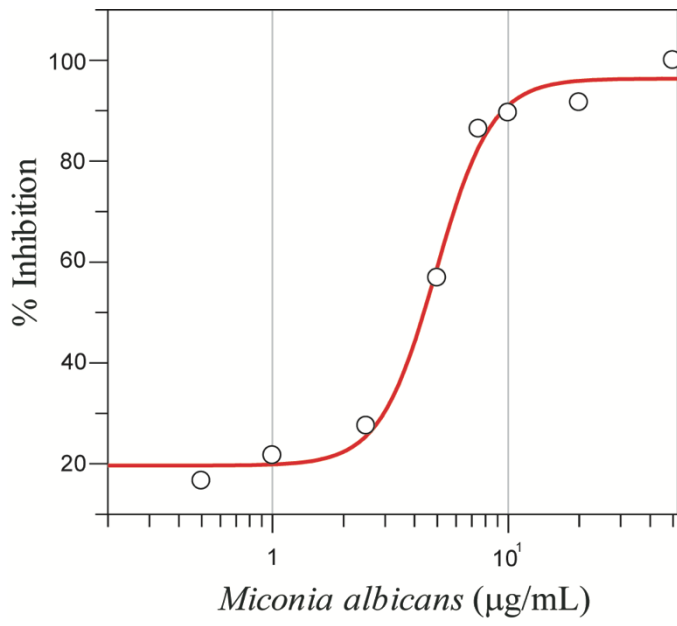

**Figure S2.** Dose-response curves of compounds **13-20** isolated from leaves of *Miconia albicans*.

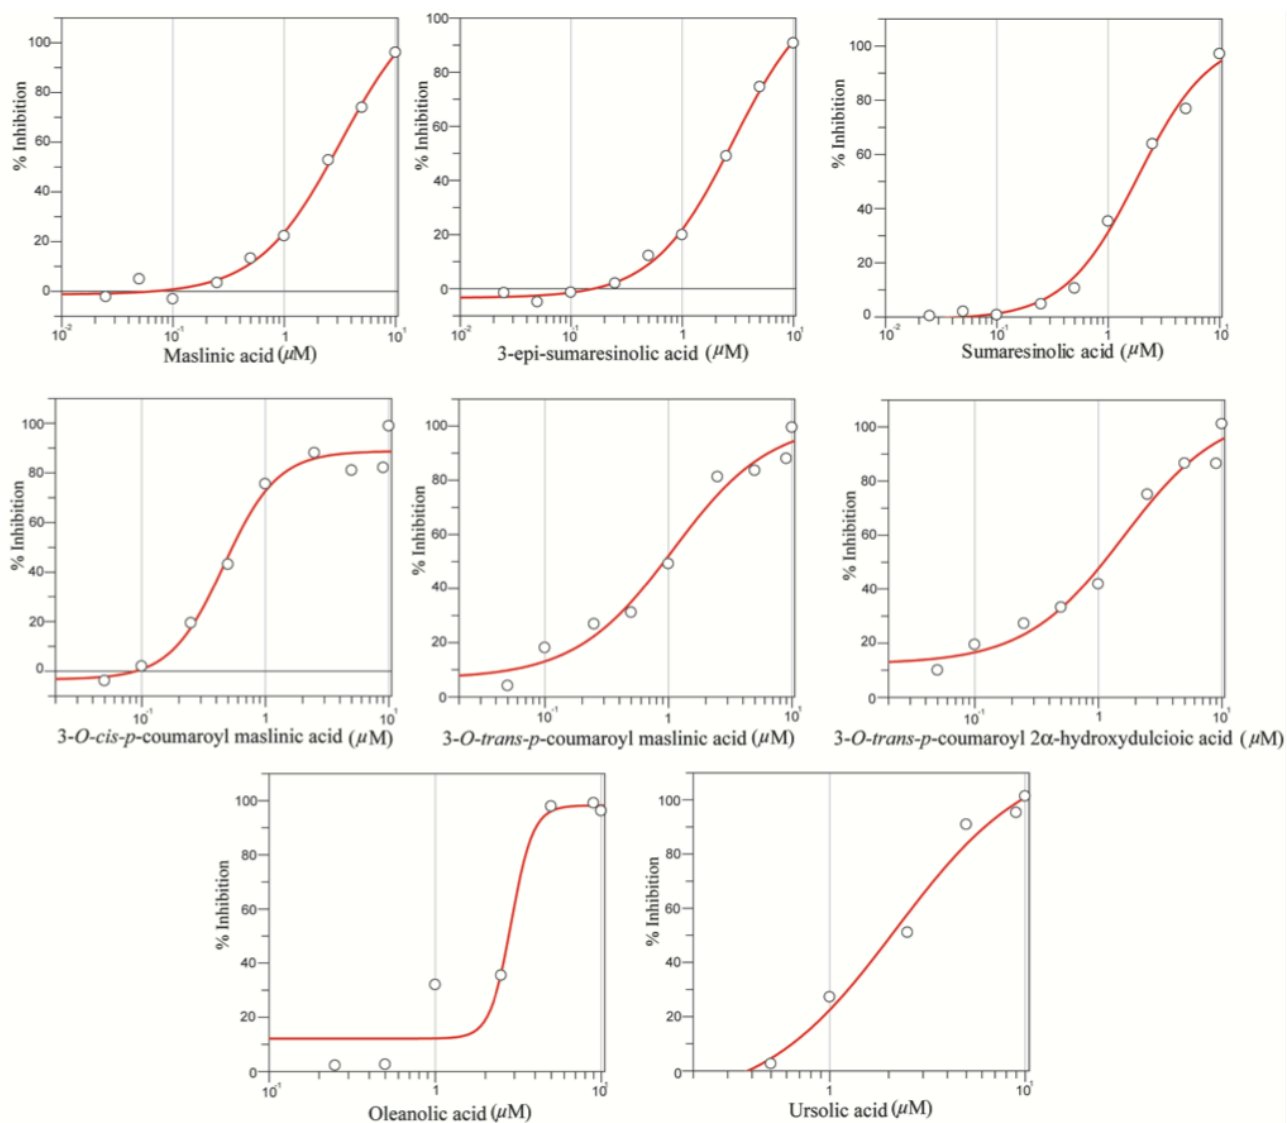

**Table S1.** Peak number, name, HRMS, <sup>1</sup>H NMR and <sup>13</sup>C NMR data for PTP1B inhibitors from *Miconia albicans* acquired in the HPLC-HRMS-SPE-NMR mode

| Peak | Name                                                                           | HRMS (molecular formula, Δ ppm)                                                                  | <sup>1</sup> H NMR δ (nH, m, J); <sup>13</sup> C NMR δ                                                                                                                                                                                                                                                                                                                                                                                                        | Ref |
|------|--------------------------------------------------------------------------------|--------------------------------------------------------------------------------------------------|---------------------------------------------------------------------------------------------------------------------------------------------------------------------------------------------------------------------------------------------------------------------------------------------------------------------------------------------------------------------------------------------------------------------------------------------------------------|-----|
| 1    | -                                                                              | 615.0997 [M-H] <sup>-</sup> ;<br>(C <sub>28</sub> H <sub>24</sub> O <sub>16</sub> , ΔM -0.8 ppm) | -                                                                                                                                                                                                                                                                                                                                                                                                                                                             | -   |
| 2    | 1- <i>O</i> -( <i>E</i> )-caffeoyl-4,6-di- <i>O</i> -galloyl-β-D-glucopyranose | 647.1214 [M+H] <sup>+</sup> ;<br>(C <sub>29</sub> H <sub>26</sub> O <sub>17</sub> (ΔM 4.4 ppm)   | <b><sup>1</sup>H NMR:</b> <i>Caffeoyl</i> : 7.58 (1H, d, 16.0 Hz, H-2'); 7.77 (1H, d, 2.1 Hz, H-4'); 7.55 (1H, dd, 8.3; 2.1 Hz, H-8'); 7.06 (1H, d, 8.3 Hz, H-7'); 6.28 (1H, d, 16.0 Hz, H-1'); <i>galloyl</i> : 6.97 and 6.90 (2H each, s); <i>glucose</i> : 5.10 (1H, d, 8.0 Hz, H-1); 4.56 (1H, m, H-4); 4.46 (1H, dd, 11.3, 7.6 Hz, H-6B); 4.33 (1H, dd, 11.3, 7.0 Hz, H-6A); 3.77-3.88 (3H, m, H-2, H-3, H-5)                                            | 19  |
| 3    | Myricetin 3- <i>O</i> -α-L-rhamnopyranoside (myricitrin)                       | 463.0880 [M-H] <sup>-</sup> ;<br>(C <sub>21</sub> H <sub>20</sub> O <sub>12</sub> , ΔM 0.4 ppm)  | 6.95 (2H, s, H-2'/H-6'); 6.37 (1H, d, 2.2 Hz, H-8); 6.20 (1H, d, 2.2 Hz, H-6); 5.32 (1H, d, 1.5 Hz, H-1''); 4.22 (1H, dd, 3.4, 1.7 Hz, H-2''); 3.79 (1H, dd, 9.6, 3.3 Hz, H-3''); 3.54 (1H, m, H-5''); 3.34 (1H, t, 9.6 Hz, H-4''); 0.94 (3H, d, 6.8 Hz, H-6'')                                                                                                                                                                                               | 20  |
| 4    | -                                                                              | 599.1047 [M-H] <sup>-</sup> ;<br>(C <sub>28</sub> H <sub>24</sub> O <sub>15</sub> , ΔM -0.8 ppm) | -                                                                                                                                                                                                                                                                                                                                                                                                                                                             | -   |
| 5    | Quercetin 3- <i>O</i> -(2''-galloyl)-α-L-rhamnopyranoside                      | 599.1041 [M-H] <sup>-</sup> ;<br>(C <sub>28</sub> H <sub>24</sub> O <sub>15</sub> , ΔM 0.2 ppm)  | <b><sup>1</sup>H NMR:</b> <i>Quercetin</i> : 7.34 (1H, d, 2.1 Hz, H-2'); 7.30 (1H, dd, 8.5, 2.1 Hz, H-6'); 6.92 (1H, d, 8.5 Hz, H-5'); 6.38 (1H, d, 2.0 Hz, H-8); 6.21 (1H, d, 2.0 Hz, H-6); <i>galloyl</i> : 6.89 (2H, s, H-3'''/H-7'''); <i>rhamnose</i> : 5.34 (1H, d, 1.5 Hz, H-1''); 4.78 (1H, dd, 3.4, 1.7 Hz, H-2''); 3.75 (1H, dd, 9.5, 3.4 Hz, H-3''); 3.34 (overlap. signal, H-4''); 3.42 (1H, dd, 9.3, 6.2 Hz, H-5''); 0.94 (3H, d, 6.2 Hz, H-6'') | 21  |
| 6    | Mearnsetin 3- <i>O</i> -α-L-rhamnopyranoside                                   | 477.1041 [M-H] <sup>-</sup> ;<br>(C <sub>20</sub> H <sub>22</sub> O <sub>12</sub> , ΔM -0.5 ppm) | <b><sup>1</sup>H NMR:</b> <i>Mearnsetin</i> : 6.88 (2H, s, H-2'/H-6'); 6.38 (1H, d, 2.0 Hz, H-8); 6.22 (1H, d, 2.0 Hz, H-6); 3.88 (3H, s, 4-O-CH <sub>3</sub> ); <i>rhamnose</i> : 5.31 (1H, d, 1.7 Hz, H-1''); 4.21 (1H, dd, 3.4, 1.8 Hz, H-2''); 3.74 (1H, dd, 9.5, 3.4 Hz, H-3''); 3.42 (1H, m, H-4''); 3.33 (1H, m, H-5''); 0.95 (3H, d, 6.8 Hz, H-6'')                                                                                                   | 22  |
| 7    | -                                                                              | 497.1434 [M-H] <sup>-</sup> ;<br>(C <sub>26</sub> H <sub>26</sub> O <sub>10</sub> , ΔM 3.9 ppm)  | -                                                                                                                                                                                                                                                                                                                                                                                                                                                             | -   |
| 8    | Kaempferol 3- <i>O</i> -arabinopyranoside                                      | 417.0825 [M-H] <sup>-</sup> ;<br>C <sub>20</sub> H <sub>18</sub> O <sub>10</sub> (ΔM 0.5 ppm)    | <b><sup>1</sup>H NMR:</b> 8.06 (2H, d, 9.0 Hz, H-2'/H-6'); 6.89 (2H, d, 9.0 Hz; H-3'/H-5'); 6.41 (1H, d, 2.1 Hz, H-8); 6.21 (1H, d, 2.1 Hz, H-6); 5.14 (1H, d, 6.4 Hz, H-1''); 3.60-3.90 (4H, m, H-2''-H-5'')                                                                                                                                                                                                                                                 | 17  |
| 9    | -                                                                              | 317.0309 [M-H] <sup>-</sup> ;<br>C <sub>15</sub> H <sub>10</sub> O <sub>8</sub> (ΔM -1.8 ppm)    | -                                                                                                                                                                                                                                                                                                                                                                                                                                                             | -   |
| 10   | -                                                                              | 417.827 [M-H] <sup>-</sup> ;<br>C <sub>20</sub> H <sub>18</sub> O <sub>10</sub> (ΔM 0.2 ppm)     | -                                                                                                                                                                                                                                                                                                                                                                                                                                                             | -   |
| 11   | -                                                                              | 431.0976 [M-H] <sup>-</sup> ;<br>C <sub>21</sub> H <sub>20</sub> O <sub>10</sub> (ΔM 1.8 ppm)    | -                                                                                                                                                                                                                                                                                                                                                                                                                                                             | -   |

|    |                                              |                                                                                               |                                                                                                                                                                                                                                                                                                                                                                                                                                                                                                                                                                                                                                                                                                                                                                                                                                                                                                                                                                                                                                              |    |
|----|----------------------------------------------|-----------------------------------------------------------------------------------------------|----------------------------------------------------------------------------------------------------------------------------------------------------------------------------------------------------------------------------------------------------------------------------------------------------------------------------------------------------------------------------------------------------------------------------------------------------------------------------------------------------------------------------------------------------------------------------------------------------------------------------------------------------------------------------------------------------------------------------------------------------------------------------------------------------------------------------------------------------------------------------------------------------------------------------------------------------------------------------------------------------------------------------------------------|----|
| 12 | -                                            | 459.1294 [M-H] <sup>-</sup> ;<br>C <sub>23</sub> H <sub>24</sub> O <sub>10</sub> (ΔM 0.5 ppm) | -                                                                                                                                                                                                                                                                                                                                                                                                                                                                                                                                                                                                                                                                                                                                                                                                                                                                                                                                                                                                                                            | -  |
| 13 | Maslinic acid                                | 473.3620 [M+H] <sup>+</sup> ;<br>C <sub>30</sub> H <sub>48</sub> O <sub>4</sub> (ΔM 0.5 ppm)  | <sup>1</sup> H NMR: 5.25 (1H, br. t, 3.6 Hz, H-12); 3.62 (1H, m, H-2); 2.91 (1H, d, 9.5 Hz, H-3); 2.87 (1H, dd, 14.0; 4.1 Hz, H-18); 1.16 (3H, s, CH <sub>3</sub> -27); 1.01 (3H, s, CH <sub>3</sub> -24); 1.00 (3H, s, CH <sub>3</sub> -23); 0.94 (3H, CH <sub>3</sub> -30); 0.91 (3H, s, CH <sub>3</sub> -29); 0.82 (3H, s, CH <sub>3</sub> -26); 0.81 (3H, s, CH <sub>3</sub> -25); <sup>13</sup> C NMR: 181.7 (C-28); 145.0 (C-13); 123.1 (C-12); 84.2 (C-3); 69.1 (C-2); 56.4 (C-5); 48.7 (C-9); 47.9 (C-1); 47.2 (C-17); 47.0 (C-19); 42.7 (C-14); 42.5 (C-18); 40.2 (C-8); 40.1 (C-8); 39.0 (C-10); 34.7 (C-21); 33.6 (C-7); 33.4 (C-22); 33.3 (C-29); 31.2 (C-20); 29.0 (C-23); 28.4 (C-15); 26.2 (C-27); 24.1 (C-11); 23.8 (C-30); 23.8 (C-16); 19.1 (C-6); 17.4 (C-26); 17.4 (C-25); 16.9 (C-24)                                                                                                                                                                                                                                   | 31 |
| 14 | 3- <i>epi</i> -Sumaresinolic acid            | 473.3625 [M+H] <sup>+</sup> ;<br>C <sub>30</sub> H <sub>48</sub> O <sub>4</sub> (ΔM 1.7 ppm)  | <sup>1</sup> H NMR: 5.28 (1H, br. t, 3.6 Hz, H-12); 4.37 (1H, br s, H-6); 3.28 (1H, t, 2.7 Hz, H-3); 2.87 (1H, dd, 14.0; 4.1 Hz, H-18); 1.31 (3H, s, CH <sub>3</sub> -25); 1.22 (3H, s, CH <sub>3</sub> -24); 1.15 (3H, s, CH <sub>3</sub> -27); 1.09 (3H, s, CH <sub>3</sub> -26); 1.00 (3H, s, CH <sub>3</sub> -23); 0.94 (3H, CH <sub>3</sub> -30); 0.91 (3H, s, CH <sub>3</sub> -29); <sup>13</sup> C NMR: 181.8 (C-28); 143.1 (C-13); 123.8 (C-12); 78.1 (C-3); 69.0 (C-6); 56.6 (C-5); 50.0 (C-1); 48.7 (C-9); 47.5 (C-17); 47.1 (C-19); 42.5 (C-18); 42.2 (C-14); 41.0 (C-15); 39.7 (C-8); 38.9 (C-4); 37.1 (C-10); 34.6 (C-21); 33.8 (C-22); 33.3 (C-29); 31.4 (C-20); 28.9 (C-23); 26.3 (C-27); 24.6 (C-24); 24.0 (C-11); 23.9 (C-16); 23.7 (C-30); 19.1 (C-2); 18.6 (C-26); 16.9 (C-25)                                                                                                                                                                                                                                            | 32 |
| 15 | Sumaresinolic acid                           | 473.3618 [M+H] <sup>+</sup> ;<br>C <sub>30</sub> H <sub>48</sub> O <sub>4</sub> (ΔM 1.5 ppm)  | <sup>1</sup> H NMR: 5.28 (1H, br. t, 3.5 Hz, H-12); 4.49 (1H, br. s, H-6); 3.07 (1H, dd, 12.0, 4.1 Hz, H-3); 2.87 (1H, dd, 13.9; 3.7 Hz, H-18); 1.30 (3H, s, CH <sub>3</sub> -25); 1.15 (3H, s, CH <sub>3</sub> -24); 1.12 (3H, s, CH <sub>3</sub> -27); 1.09 (3H, s, CH <sub>3</sub> -26); 1.04 (3H, s, CH <sub>3</sub> -23); 0.94 (3H, CH <sub>3</sub> -30); 0.90 (3H, s, CH <sub>3</sub> -29); <sup>13</sup> C NMR: 181.3 (C-28); 144.1 (C-13); 123.6 (C-12); 79.8 (C-3); 68.5 (C-6); 56.8 (C-5); 49.0 (C-17); 48.9 (C-9); 46.9 (C-19); 43.1 (C-14); 42.3 (C-18); 41.2 (C-1); 39.7 (C-8); 38.7 (C-4); 38.5 (C-10); 34.6 (C-21); 33.5 (C-22); 33.1 (C-30); 31.3 (C-20); 28.5 (C-15); 28.1 (C-24); 27.7 (C-7); 26.1 (C-27); 24.0 (C-11); 23.7 (C-16); 23.5 (C-29); 19.3 (C-2); 18.5 (C-26); 18.5 (C-23); 17.0 (C-25)                                                                                                                                                                                                                        | 32 |
| 16 | 3- <i>O-cis-p</i> -coumaroyl-maslinic acid   | 619.3979[M+H] <sup>+</sup> ;<br>C <sub>39</sub> H <sub>54</sub> O <sub>6</sub> (ΔM 2.7 ppm)   | <sup>1</sup> H NMR: 7.64 (2H, d, 8.5 Hz, H-2'/6'); 6.88 (1H, d, 12.8 Hz, H-7'); 6.73 (2H, d, 8.5 Hz, H-3'/5'); 5.85 (1H, 12.8 Hz, H-8'); 5.30 (1H, br t, 3.5 Hz, H-12); 4.60 (1H, d, 9.5 Hz, H-3); 3.85 (1H, td, 9.8, 5.7, 1.5 Hz, H-2); 2.88 (1H, dd, 13.6, 4.2 Hz, H-18); 1.16 (3H, s, CH <sub>3</sub> -24); 1.13 (3H, s, CH <sub>3</sub> -27); 0.94 (3H, s, CH <sub>3</sub> -30); 0.90 (9H, overlapping signals, CH <sub>3</sub> -23/CH <sub>3</sub> -26/CH <sub>3</sub> -29); 0.83 (3H, s, CH <sub>3</sub> -25); <sup>13</sup> C NMR: 181.7 (C-28); 169.5 (C-9'); 146.0 (C-2'/C-6'); 144.7 (C-13); 144.3 (C-7'); 133.4 (C-1'); 127.3 (C-4'); 123.4 (C-12); 117.0 (C-3'/C-5'); 115.5 (C-8'); 85.3 (C-3); 67.3 (C-2); 57.8 (C-5); 54.1 (C-9); 49.9 (C-17); 47.0 (C-19); 42.9 (C-14); 42.6 (C-18); 42.5 (C-1); 41.3 (C-22); 40.6 (C-4); 40.1 (C-8); 40.0 (C-10); 34.5 (C-21); 33.5 (C-7); 33.2 (C-29); 31.4 (C-20); 30.2 (C-15); 29.0 (C-23); 26.0 (C-27); 24.4 (C-11); 23.8 (C-16); 23.8 (C-30); 19.1 (C-6); 18.7 (C-24); 17.4 (C-25/C-26) | 33 |
| 17 | 3- <i>O-trans-p</i> -coumaroyl-maslinic acid | 619.3989[M+H] <sup>+</sup> ;<br>C <sub>39</sub> H <sub>54</sub> O <sub>6</sub> (ΔM 0.7 ppm)   | <sup>1</sup> H NMR: 7.63 (1H, d, 15.9 Hz, H-7'); 7.47 (2H, d, 8.6 Hz, H-2'/6'); 6.81 (2H, d, 8.6 Hz, H-3'/5'); 6.39 (1H, 15.9 Hz, H-8'); 5.30 (1H, br t, 3.5 Hz, H-12); 4.64 (1H, d, 10.0 Hz, H-3); 3.84 (1H, td, 10.0, 10.0, 4.0 Hz, H-2); 2.88 (1H, dd, 13.6, 4.2 Hz, H-18); 1.16 (3H, s, CH <sub>3</sub> -24); 1.13 (3H, s, CH <sub>3</sub> -27); 0.94 (3H, s, CH <sub>3</sub> -30); 0.90 (9H, overlapping signals, CH <sub>3</sub> -23/CH <sub>3</sub> -26/CH <sub>3</sub> -29); 0.87 (3H, s, CH <sub>3</sub> -25); <sup>13</sup> C NMR: 181.7 (C-28); 169.5 (C-9'); 160.4 (C-4'); 145.9 (C-7'); 144.2 (C-13); 126.9 (C-1'); 130.7 (C-2'/C-6'); 123.4 (C-12); 116.5 (C-3'/C-5'); 115.5 (C-8'); 85.2 (C-3); 67.3 (C-2); 57.7 (C-5); 49.9 (C-17); 48.7 (C-                                                                                                                                                                                                                                                                                 | 33 |

|    |                                                                        |                                                                                                    |                                                                                                                                                                                                                                                                                                                                                                                                                                                                                                                                                                                                                                                                                                                                                                                                                                                                                                                                                                                                                                                                          |    |
|----|------------------------------------------------------------------------|----------------------------------------------------------------------------------------------------|--------------------------------------------------------------------------------------------------------------------------------------------------------------------------------------------------------------------------------------------------------------------------------------------------------------------------------------------------------------------------------------------------------------------------------------------------------------------------------------------------------------------------------------------------------------------------------------------------------------------------------------------------------------------------------------------------------------------------------------------------------------------------------------------------------------------------------------------------------------------------------------------------------------------------------------------------------------------------------------------------------------------------------------------------------------------------|----|
|    |                                                                        |                                                                                                    | 9); 46.7 (C-19); 43.0 (C-14); 42.5 (C-18); 42.5 (C-8); 42.5 (C-1); 41.0 (C-22); 40.5 (C-4); 39.5 (C-10); 34.5 (C-21); 33.7 (C-7); 33.3 (C-29); 31.3 (C-20); 30.3 (C-15); 28.9 (C-23); 25.9 (C-27); 24.3 (C-11); 23.8 (C-16); 23.7 (C-6); 23.7 (C-30); 18.7 (C-24); 17.4 (C-25); 17.3 (C-26)                                                                                                                                                                                                                                                                                                                                                                                                                                                                                                                                                                                                                                                                                                                                                                              |    |
| 18 | 3- <i>O</i> -trans- <i>p</i> -coumaroyl-2 $\alpha$ -hydroxydulcic acid | 619.3974 [M+H] <sup>+</sup> ; C <sub>39</sub> H <sub>54</sub> O <sub>6</sub> ( $\Delta$ M 3.1 ppm) | <sup>1</sup> H NMR: 7.63 (1H, d, 15.8 Hz, H-7'); 7.46 (2H, d, 9.1 Hz, H-2'/6'); 6.81 (2H, d, 9.1 Hz, H-3'/5'); 6.38 (1H, 15.8 Hz, H-8'); 5.25 (1H, br t, 3.8 Hz, H-12); 4.63 (1H, d, 9.8 Hz, H-3); 3.84 (1H, td, 9.8, 9.8, 4.0 Hz, H-2); 2.88 (1H, dd, 14.4, 4.6 Hz, H-18); 0.97 (3H, s, CH <sub>3</sub> -28); 0.95 (3H, d, 6.1 Hz, CH <sub>3</sub> -29); 0.95 (3H, s, CH <sub>3</sub> -25); 0.94 (3H, s, CH <sub>3</sub> -27); 0.90 (3H, s, CH <sub>3</sub> -26); 0.90 (3H, s, CH <sub>3</sub> -23); 0.87 (3H, s, CH <sub>3</sub> -24); <sup>13</sup> C NMR: 181.5 (C-30); 169.3 (C-9'); 160.9 (C-4'); 145.9 (C-7'); 139.5 (C-13); 124.9 (C-1'); 130.7 (C-2'/C-6'); 126.4 (C-12); 116.5 (C-3'/C-5'); 115.4 (C-8'); 85.2 (C-3); 67.4 (C-2); 57.7 (C-5); 49.9 (C-17); 48.4 (C-9); 40.0 (C-19); 40.2 (C-14); 42.7 (C-18); 42.4 (C-8); 48.4 (C-1); 37.8 (C-22); 40.5 (C-4); 40.0 (C-10); 34.5 (C-21); 33.7 (C-7); 23.5 (C-29); 54.0 (C-20); 30.3 (C-15); 28.8 (C-23); 23.5 (C-27); 24.2 (C-11); 23.8 (C-16); 19.2 (C-6); 21.2 (C-28); 17.5 (C-24); 17.8 (C-25); 17.3 (C-26) | 34 |
| 19 | Oleanoic acid                                                          | 457.3668 [M+H] <sup>+</sup> ; C <sub>30</sub> H <sub>48</sub> O <sub>3</sub> ( $\Delta$ M 1.8 ppm) | <sup>1</sup> H NMR: 5.24 (1H, br. t, 3.7 Hz, H-12); 3.14 (1H, dd, 11.6, 4.8 Hz, H-3); 2.85 (1H, dd, 14.3; 4.1 Hz, H-18); 1.16 (3H, s, CH <sub>3</sub> -27); 0.97 (3H, s, CH <sub>3</sub> -23); 0.94 (3H, s, CH <sub>3</sub> -25); 0.94 (3H, s, CH <sub>3</sub> -30); 0.90 (3H, s, CH <sub>3</sub> -29); 0.82 (3H, CH <sub>3</sub> -26); 0.77 (3H, s, CH <sub>3</sub> -24); <sup>13</sup> C NMR: 181.4 (C-28); 145.1 (C-13); 123.2 (C-12); 79.3 (C-3); 28.1 (C-2); 56.6 (C-5); 48.7 (C-9); 47.4 (C-17); 46.8 (C-19); 42.6 (C-14); 42.3 (C-18); 39.5 (C-1); 40.1 (C-8); 39.5 (C-4); 37.9 (C-10); 34.6 (C-21); 33.7 (C-22); 33.3 (C-7); 33.2 (C-29); 31.3 (C-20); 27.5 (C-15); 26.0 (C-27); 23.8 (C-11); 23.7 (C-16); 23.7 (C-30); 28.3 (C-23); 18.9 (C-6); 17.2 (C-26); 16.0 (C-24); 15.4 (C-25);                                                                                                                                                                                                                                                                          | 35 |
| 20 | Ursolic acid                                                           | 457.3672 [M+H] <sup>+</sup> ; C <sub>30</sub> H <sub>48</sub> O <sub>3</sub> ( $\Delta$ M 0.9 ppm) | <sup>1</sup> H NMR: 5.22 (1H, br. t, 3.7 Hz, H-12); 3.15 (1H, dd, 11.6, 4.5 Hz, H-3); 2.20 (1H, d, 11.0 Hz, H-18); 1.11 (3H, s, CH <sub>3</sub> -27); 0.97 (3H, s, CH <sub>3</sub> -23); 0.96 (3H, d, 6.6 Hz, CH <sub>3</sub> -30); 0.95 (3H, s, CH <sub>3</sub> -25); 0.88 (3H, d, 6.8 Hz, CH <sub>3</sub> -29); 0.85 (3H, CH <sub>3</sub> -26); 0.77 (3H, s, CH <sub>3</sub> -24); <sup>13</sup> C NMR: 181.6 (C-28); 139.5 (C-13); 126.6 (C-12); 79.4 (C-3); 56.5 (C-5); 54.1 (C-18); 48.8 (C-17); 48.7 (C-9); 40.1 (C-19); 42.9 (C-14); 40.2 (C-1); 40.1 (C-8); 39.6 (C-4); 37.9 (C-10); 34.0 (C-22); 33.3 (C-20); 31.5 (C-21); 31.5 (C-7); 28.9 (C-15); 28.5 (C-23); 27.7 (C-2); 25.0 (C-16); 24.0 (C-11); 23.8 (C-27); 21.3 (C-30); 19.2 (C-6); 17.6 (C-26); 17.4 (C-29); 16.1 (C-24); 15.7 (C-25);                                                                                                                                                                                                                                                                | 36 |
